# Supplementary material for: Environmental and Molecular Modulation of Motor Individuality in Larval Zebrafish
Source: PubMed Central journal article supplement (PMC8685292; doi:10.3389/fnbeh.2021.777778), 2021-12-06
Supplement: Image_1.pdf [file Image_1.pdf]

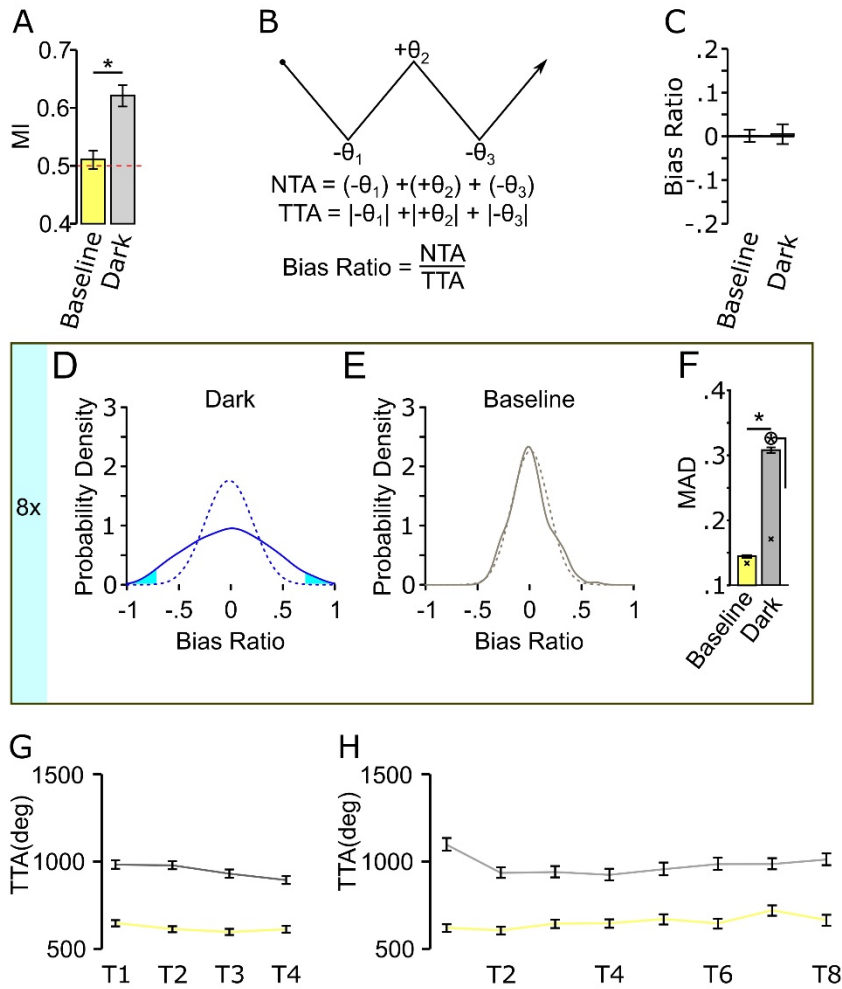

## Supplementary Figure 1

**Supplemental Figure 1. (A)** 4X match index for paired baseline (yellow) and dark response (grey). Red dotted line indicates random choice. Asterisk,  $p < 0.05$  Wilcoxon signed-rank test ( $N = 374$ ). **(B)** Representation and calculation used for generating bias ratio. NTA is the sum of left (-) and right (+) angular displacement, while TTA is the absolute sum of all angular displacement. Bias ratio is the dividend of NTA to TTA. **(C)** Population average of 4X recordings ( $n = 374$ ) **(D-F)** Same analysis as in Figure 1C-E except for 8X recordings. Asterisk  $p < 0.05$ . Asterisk in circle,  $p < 0.05$  to MAD permutation value. **(G-H)** 4x ( $N=374$ ) and 8X ( $N=189$ ) TTA for baseline (yellow) and dark response (grey).

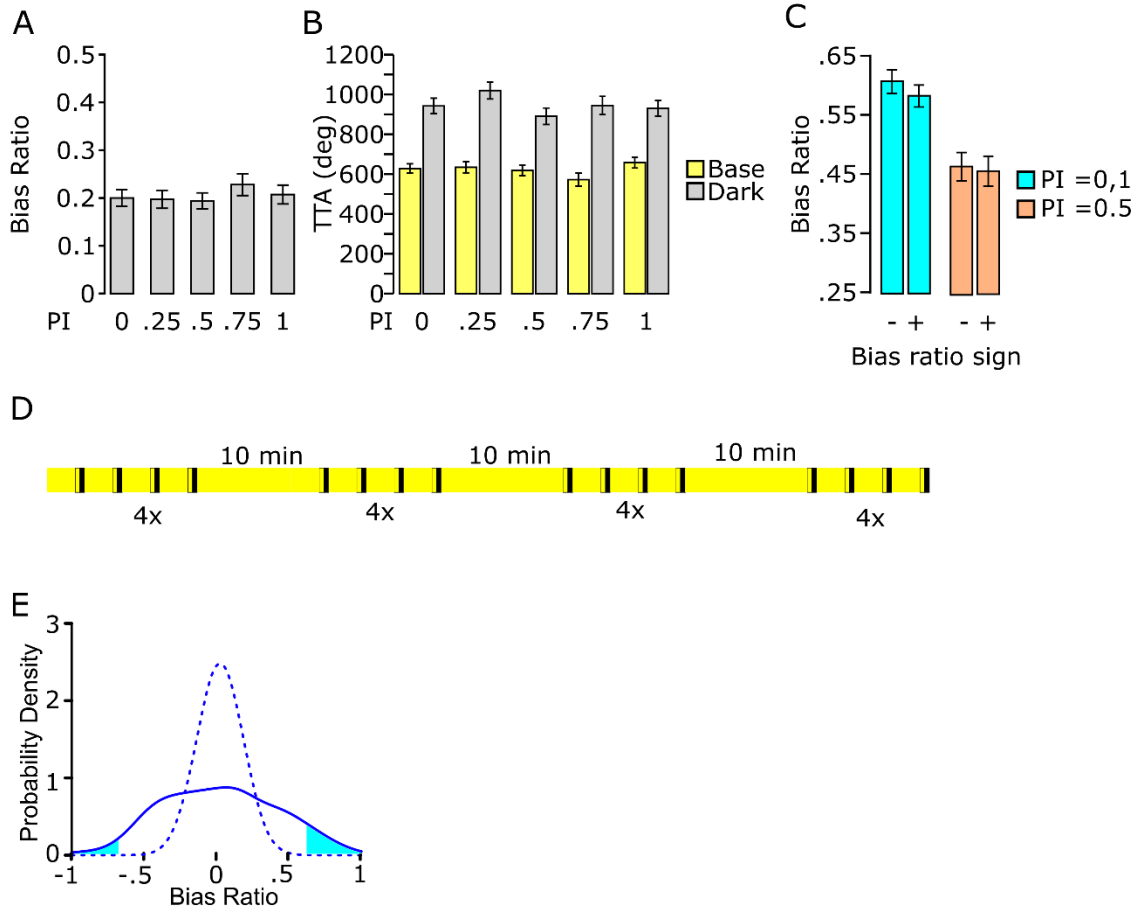

## Supplementary Figure 2

**Supplemental Figure 2.** **(A)** Absolute bias ratio for 4x baseline illumination responses per PI (PI 0, N=66; PI 0.25, N=74; PI 0.5, N=75; PI 0.75, N=75; PI 1, N=67). **(B)** TTA for data in A, showing baseline (yellow) and dark (grey) responses. **(C)** Single event absolute bias ratio for matched (PI 0,1 cyan) and unbiased (PI 0.5, orange) individuals sorted by direction (+, rightward; -, leftward). **(D)** Diagram of q4x recording. Yellow and black indicating lights on and off, respectively. Black outline areas indicate 30 second recording windows. **(E)** Average q4X probability density distribution for dark responses (solid line, N=114) and permutation populations generated from the average of 1000 resampled populations (dotted line). Cyan fill displays percent of population with strong left (<-0.3) and right (>0.3) average bias ratios.

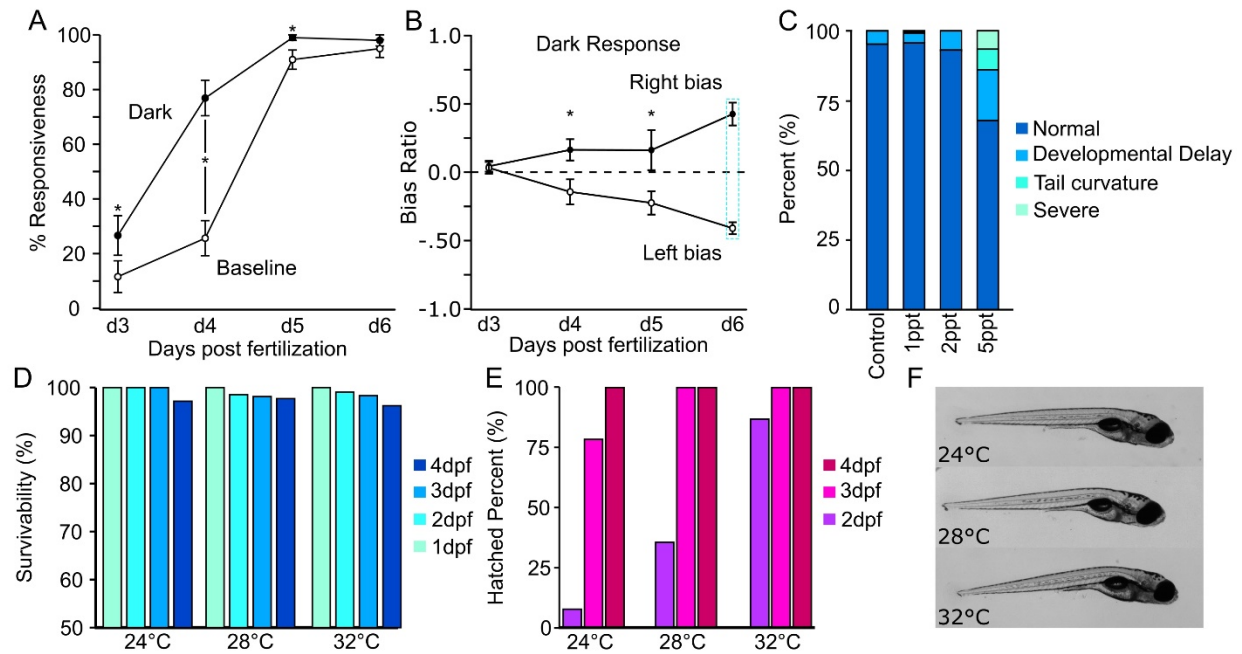

### Supplementary Figure 3

**Supplemental Figure 3. (A-B)** Developmental onset of turn bias. Individual larvae were tested daily in a 4X assay from 3 to 6 dpf. **(A)** Proportion of individuals that show motor responsiveness (N=25) **(B)** Presence of turn bias during development. At 6dpf (dotted blue box), larvae were categorized as right (N=9) or left (N=16) bias based on average bias ratio (+, right bias; -, left bias) to group responses over the testing interval. Asterisk  $p < 0.05$ ,  $t$ -test between points at same developmental stage in A and B. No significance shown for 6dpf in B as this timepoint was used to group larvae by performance. **(C)** Phenotypic scoring at 4dpf following variable salinity exposures during early development. As 5ppt generated some developmental abnormalities this treatment was excluded from behavior testing. **(D)** Survival of larvae raised from 1-4dpf at different temperatures (24°C, N=103; 28°C, N=180; 32°C, N=209). **(E)** Proportion of hatched (dechorinated) embryos due to different temperatures (24°C, N=103; 28°C, N=180; 32°C, N=209). **(F)** Representative images of 6dpf larvae after varying temperature exposure from 1-4 dpf.

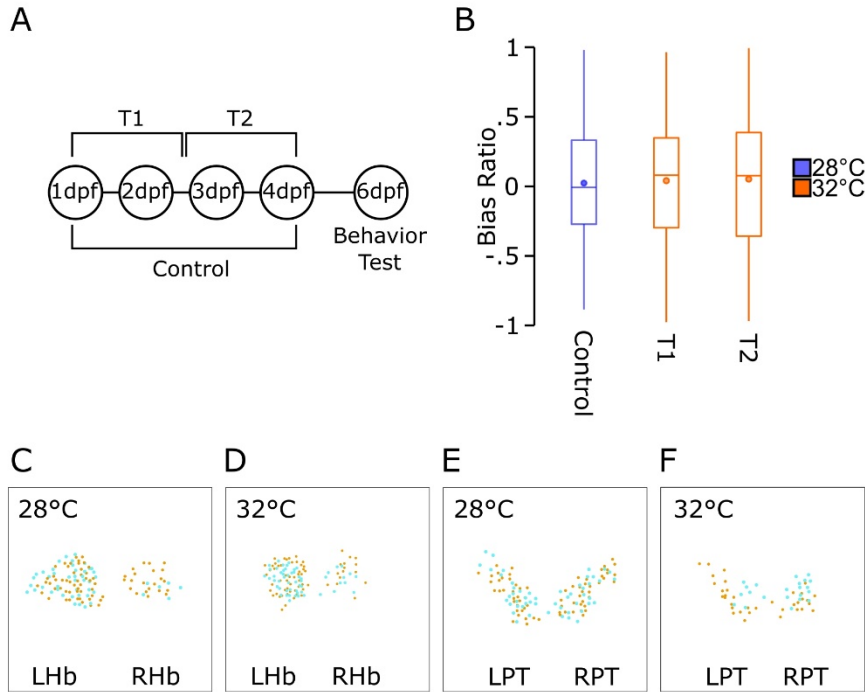

## Supplementary Figure 4

**Supplemental Figure 4. (A)** Timeline of elevated temperature testing showing control (28°C) and T1 (31-55 hpf, 32°C) and T2 (55-79 hpf, 32°C) testing conditions which are not statistically different from random (1 sample t-test against 0: control-  $0.023 \pm 0.043$   $t(100)=0.53$ ,  $p=0.60$ ; T1-  $0.040 \pm 0.042$   $t(100)=0.97$ ,  $p=0.33$ ; T2-  $0.052 \pm 0.045$   $t(106)=1.151$ ,  $p=0.25$ ). **(B)** Average population bias ratio for 28°C control (purple, N=101) and T1 (orange, N=111) and T2 (orange, N=107) elevated temperature groups. Circles show means. **(C-F)** Representative neuron counts showing two overlaid examples (represented by orange and cyan, respectively) with circles representing the location of individual neurons for the habenula (28°C (C); 32°C (D)) and the PT (28°C (E); 32°C (F)).

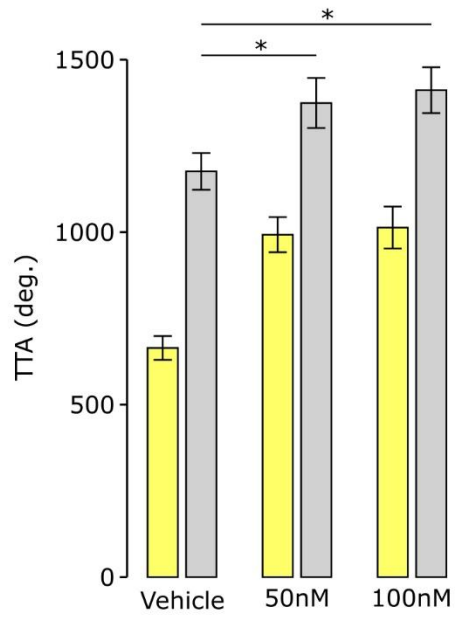

## Supplementary Figure 5

**Supplemental Figure 5.** TTA following Notch inhibitor exposure during early development (vehicle, N=69; 50 $\mu$ M, N=69; 100 $\mu$ M, N=48).
